# Supplementary material for: The Central Fluid Percussion Brain Injury in a Gyrencephalic Pig Brain: Scalable Diffuse Injury and Tissue Viability for Glial Cell Immunolabeling following Long-Term Refrigerated Storage
Source: MDPI journal article supplement (doi:10.3390/biomedicines11061682), 2023-06-10
Supplement: s1 [file s1]

Supplemental Table S1: Full Data for individual animals used in this study.

| Animal ID | Injury (ATM) | Weight (kg) | ATM/kg | Injury duration (ms) | TAI CC | TAI Thalamus | Microglia Index CC | Microglia Index Thalamus | O2%   | PaO2   | PaCO2 | MABP   | pH   | Hct   | HCO3  | Hb    |
|-----------|--------------|-------------|--------|----------------------|--------|--------------|--------------------|--------------------------|-------|--------|-------|--------|------|-------|-------|-------|
| #10       | 1.64         | 18.19       | 0.09   |                      | 17.46  | 3.32         | 4.63               | 3.88                     | 99.75 | 617.63 | 39.00 |        | 7.47 | 29.25 | 28.73 | 9.73  |
| #12       | 2.12         | 17          | 0.12   | 32                   | 76.38  | 13.95        | 4.88               | 4.50                     | 98.50 | 226.70 | 36.91 | 73.05  | 7.50 | 32.00 | 29.20 | 10.70 |
| #13       | 1.5          | 29.5        | 0.05   | 33.2                 | 16.13  | 20.57        | 4.02               | 4.38                     | 98.95 | 461.30 | 36.85 | 81.53  | 7.53 | 28.00 | 31.05 | 9.33  |
| #14       | 2.13         | 16.5        | 0.13   | 24                   | 359.30 | 21.90        | 4.94               | 4.38                     | 99.90 | 577.68 | 36.48 | 75.20  | 7.53 | 32.83 | 30.97 | 10.97 |
| #15       | 1.66         | 18.4        | 0.09   | 28.8                 | 85.63  | 9.25         | 3.94               | 3.88                     | 99.90 | 605.74 | 37.73 | 76.00  | 7.54 | 24.29 | 32.54 | 8.14  |
| #17       | 1.69         | 14.9        | 0.11   | 32.8                 | 6.21   | 7.33         | 4.81               | 2.50                     | 99.02 | 342.90 | 37.60 | 72.11  | 7.51 | 27.00 | 30.45 | 8.98  |
| #18       | 1.83         | 17.5        | 0.10   |                      | 80.96  | 14.53        | 4.31               | 4.75                     | 99.66 | 494.06 | 40.03 | 85.95  | 7.50 | 27.29 | 31.54 | 9.07  |
| #19       | 1.53         | 19.2        | 0.08   | 31.6                 | 9.92   | 5.92         | 3.31               | 2.75                     | 99.90 | 561.27 | 37.86 | 64.66  | 7.54 | 30.43 | 32.40 | 10.19 |
| #20       | 1.39         | 24.1        | 0.06   | 33.2                 | 29.33  | 6.98         | 3.75               | 4.63                     | 99.90 | 600.45 | 38.25 | 69.51  | 7.53 | 27.33 | 32.07 | 9.10  |
| #21       | 1.61         | 21.2        | 0.08   | 30                   | 75.08  | 17.43        | 4.56               | 4.50                     | 99.90 | 588.96 | 36.86 | 86.37  | 7.53 | 29.80 | 31.30 | 9.92  |
| #22       | 1.66         | 19.3        | 0.09   | 32                   | 26.25  | 9.33         | 3.44               | 4.50                     | 99.90 | 596.66 | 37.37 | 74.13  | 7.52 | 25.57 | 30.53 | 8.53  |
| #23       | 1.77         | 19.3        | 0.09   | 26                   | 35.58  | 4.42         | 3.88               | 3.38                     | 99.90 | 560.72 | 37.73 | 89.32  | 7.52 | 29.33 | 31.10 | 9.80  |
| #24       | 1.55         | 24.4        | 0.06   | 32.2                 | 5.91   | 4.47         | 3.75               | 2.88                     | 99.34 | 329.16 | 37.20 | 74.70  | 7.53 | 33.80 | 31.30 | 11.30 |
| #26       | 1.82         | 19.6        | 0.09   | 34.6                 | 3.29   | 6.50         | 3.44               | 0.75                     | 98.23 | 362.11 | 37.83 | 93.44  | 7.49 | 22.57 | 29.30 | 7.51  |
| #27       | 1.67         | 20.4        | 0.08   | 31.8                 | 22.17  | 13.72        | 3.69               | 4.25                     | 98.60 | 388.98 | 38.70 | 83.88  | 7.51 | 26.38 | 31.41 | 8.81  |
| #28       | 1.61         | 19.8        | 0.08   | 32.4                 | 26.13  | 7.93         | 3.63               | 3.63                     | 99.90 | 518.01 | 36.63 | 87.49  | 7.50 | 18.00 | 28.32 | 6.06  |
| #30       | 1.61         | 21.4        | 0.08   | 31.6                 | 14.13  | 7.28         | 3.71               | 3.50                     | 99.90 | 479.95 | 38.73 | 90.60  | 7.50 | 31.71 | 30.24 | 10.57 |
| #31       | 1.58         | 21.4        | 0.07   | 23.2                 | 26.13  | 10.75        | 2.63               | 4.13                     | 99.90 | 546.95 | 35.15 | 80.44  | 7.54 | 24.63 | 30.00 | 8.19  |
| #16       | 0            | 15.3        | 0.00   | 0                    | 1.33   | 1.57         | 0.94               | 1.88                     | 98.81 | 161.83 | 36.36 | 70.75  | 7.52 | 23.14 | 29.47 | 7.71  |
| #25       | 0            | 17.7        | 0.00   | 0                    | 0.50   | 0.98         | 1.19               | 0.75                     | 98.86 | 381.93 | 38.89 | 109.01 | 7.46 | 31.86 | 28.29 | 10.59 |
| #29       | 0            | 24.4        | 0      | 0                    | 0.09   | 3.00         | 1.38               | 0.88                     | 99.90 | 535.46 | 38.53 | 78.65  | 7.48 | 28.63 | 28.61 | 9.53  |

ATM=atmospheric pressure, ms=milliseconds, TAI=traumatic axonal injury, CC=corpus callosum, MABP=mean arterial blood pressure. All blood gas and MABP readouts from the last hour prior to sacrifice (5-6hr post-injury).
